# Supplementary material for: Redox-active, luminescent coordination nanosheet capsules containing magnetite
Source: PubMed Central journal article supplement (PMC7429495; doi:10.1038/s41598-020-70715-6), 2020-08-14
Supplement: 41598_2020_70715_MOESM1_ESM.pdf [file 41598_2020_70715_MOESM1_ESM.pdf]

## SUPPLEMENTARY INFORMATION

### **Redox-active, luminescent coordination nanosheet capsules containing magnetite**

**Ryo Arai<sup>1</sup>, Mengjuan Li<sup>1,2</sup>, Ryojun Toyoda<sup>1</sup>, Hiroaki Maeda<sup>1,3</sup>, and Hiroshi  
Nishihara<sup>1,3\*</sup>**

<sup>1</sup> Department of Chemistry, School of Science, The University of Tokyo, 7-3-1 Hongo, Bunkyo-ku, Tokyo 113-0033, Japan. <sup>2</sup> College of Textile Science and Engineering, Jiangnan University, Wuxi, Jiangsu, China. <sup>3</sup> Research Center for Science and Technology, Tokyo University of Science, 2641 Yamazaki, Noda, Chiba, 278-8510 Japan. \*e-mail [nishihara@rs.tus.ac.jp](mailto:nishihara@rs.tus.ac.jp)

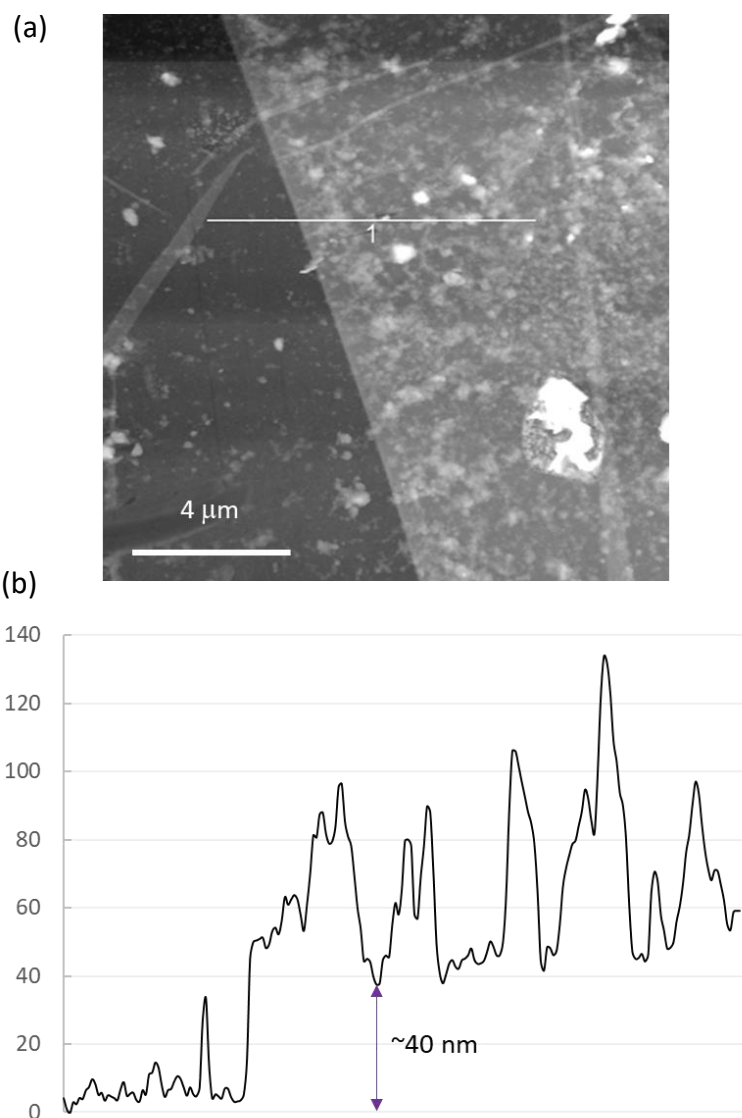

**Supplementary Figure 1** | AFM analysis of a  $\text{Fe}(\text{tpy})_2$  CONASH capsule fabricated by the dropping method. (a) A topological image. (b) The height profile along line 1.

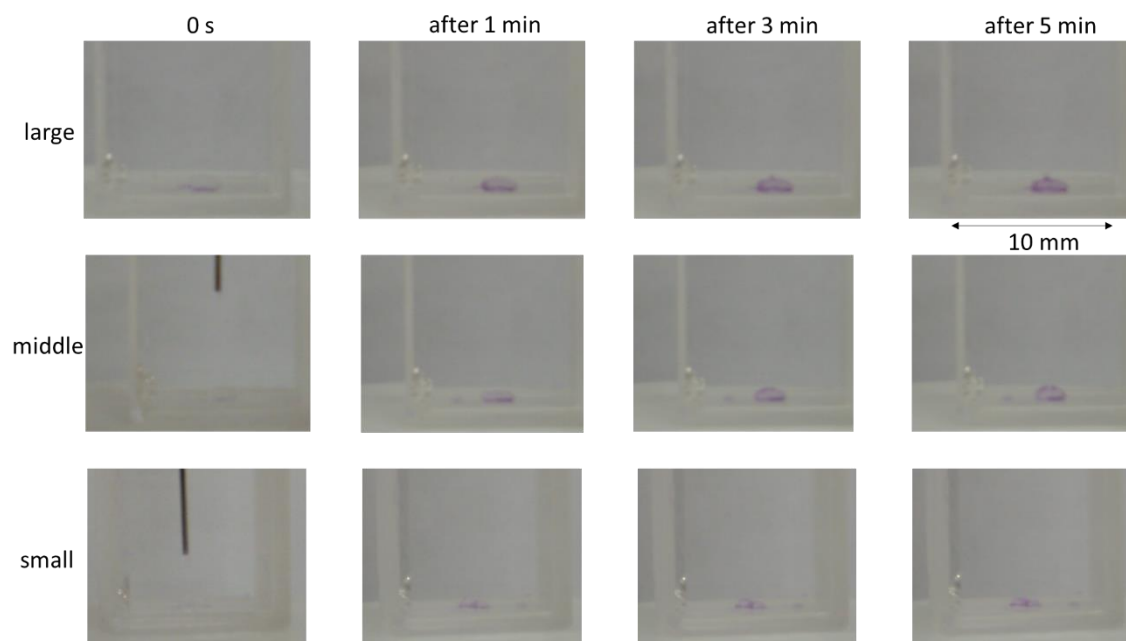

**Supplementary Figure 2** | Photographs of CONASH capsules formed after dropping a DCM solution of ligand **1** in an aqueous solution of  $\text{Fe}(\text{BF}_4)_2$  and SDS.

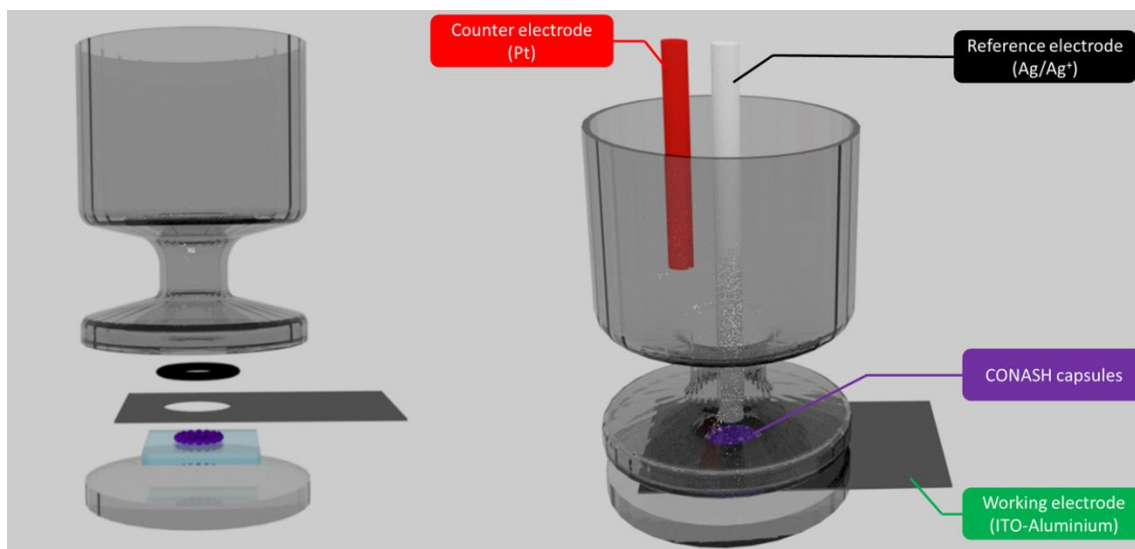

**Supplementary Figure 3|** Setup of electrochemical measurement of CONASH capsules.

(a)

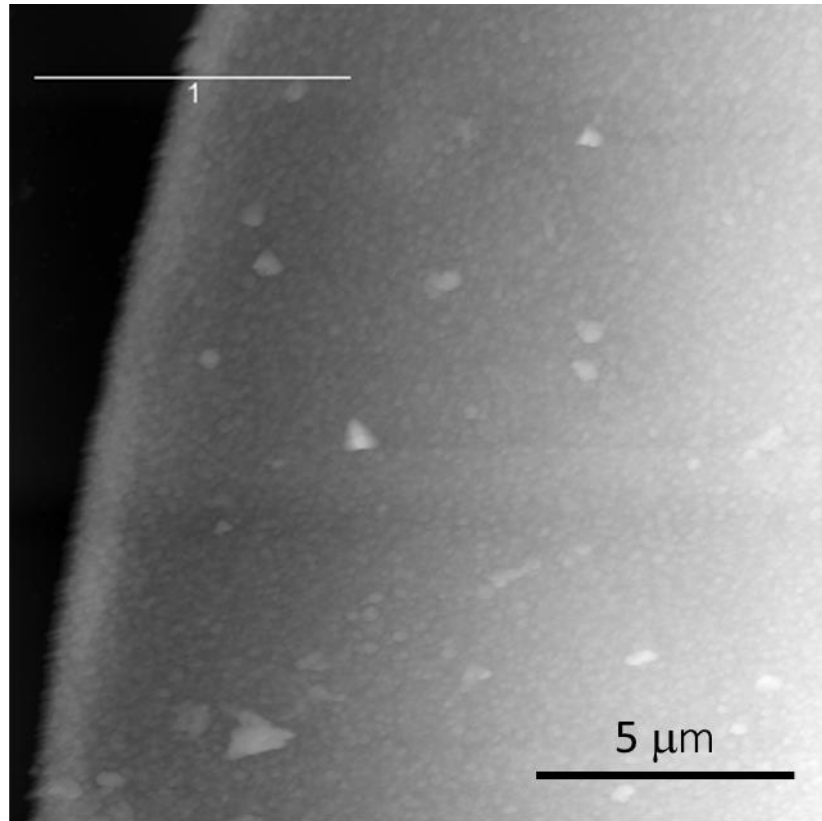

(b)

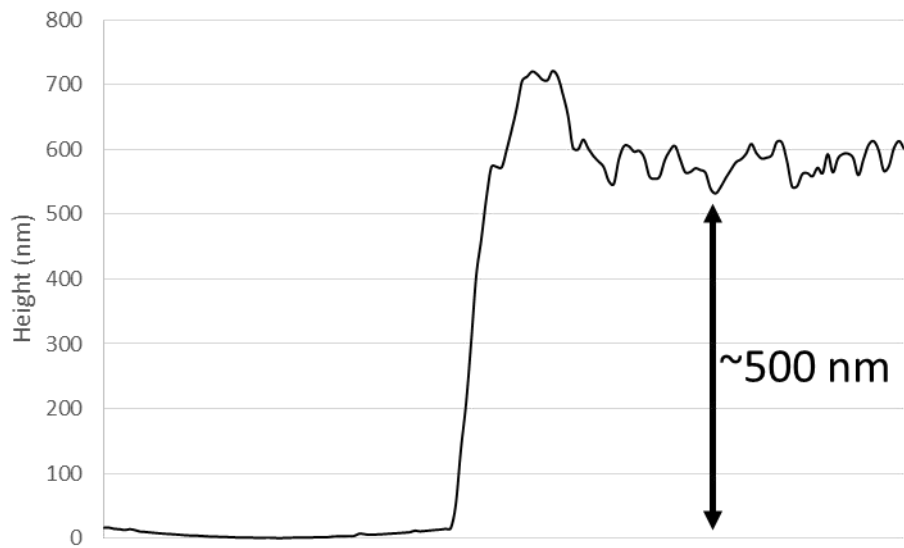

**Supplementary Figure 4** | AFM analysis of a  $\text{Fe}(\text{tpy})_2$  CONASH capsule fabricated by the syringe pump method. (a) A topographical image. (b) The height profile along line 1.

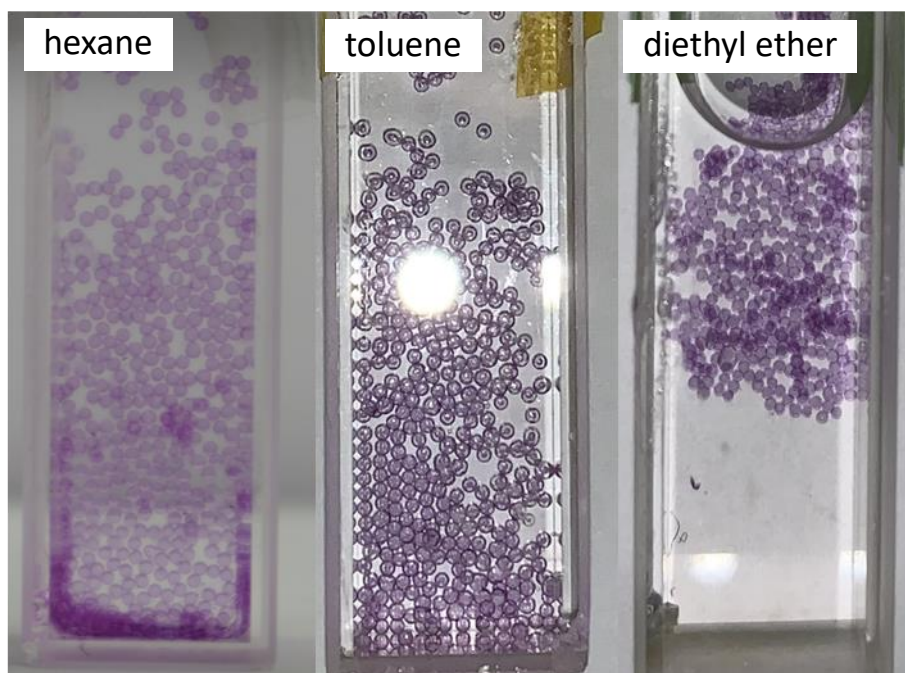

**Supplementary Figure 5** | Images of  $\text{Fe}(\text{tpy})_2$  CONASH capsules collected in hexane, toluene and diethyl ether.

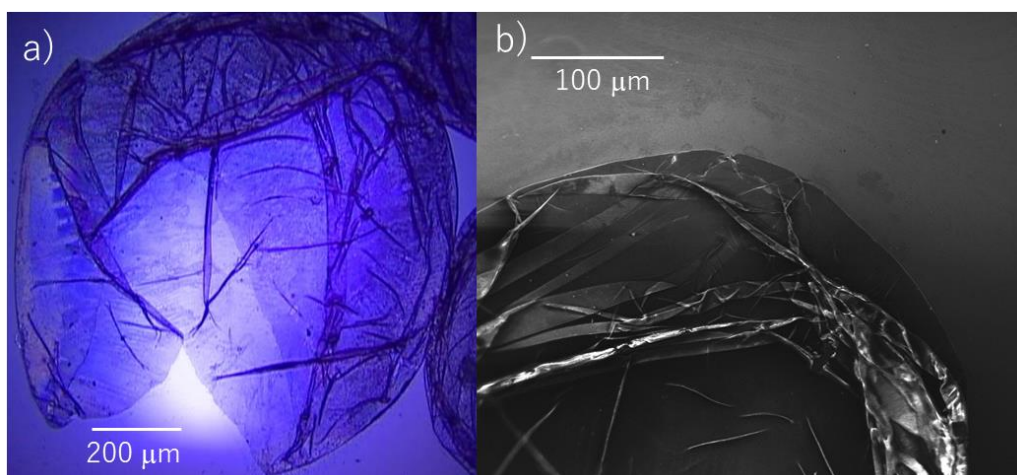

**Supplementary Figure 6** | An optical microscope image of a  $\text{Fe}(\text{tpy})_2$  CONASH capsule on a glass plate (a), and a SEM image of a  $\text{Fe}(\text{tpy})_2$  CONASH capsule on silicon fabricated by the syringe pump method (b).
